# Supplementary material for: Synthesis of a cationic polyacrylamide by a photocatalytic surface-initiated method and evaluation of its flocculation and dewatering performance: nano-TiO2 as a photo initiator
Source: Royal Society of Chemistry journal article supplement (doi:10.1039/c8ra05622f), 2018-01-01
Supplement: c8ra05622f1.pdf [file c8ra05622f1.pdf]

## Supporting Information

### Synthesis of a Cationic Polyacrylamide by Photocatalytic Surface-Initiated Method and Evaluation of Its Flocculation and Dewatering Performance: Nano-TiO<sub>2</sub> as Photo Initiator

Yongzhi Liu <sup>a, b</sup>, Huaili Zheng <sup>a, b\*</sup>, Yili Wang <sup>c</sup>, Xinyu Zheng <sup>a, b</sup>, Moxi Wang <sup>a, b</sup>, Jie Ren <sup>a, b</sup>,  
Chuanliang Zhao <sup>a, b</sup>

<sup>a</sup>Key Laboratory of the Three Gorges Reservoir Region's Eco-Environment, Ministry of Education, Chongqing University, Chongqing 400045, PR China.

<sup>b</sup>National Centre for International Research of Low-carbon and Green Buildings, Chongqing University, Chongqing 400045, PR China.

<sup>c</sup>College of Environmental Science and Engineering, Research Center for Water Pollution Source Control and Eco-remediation, Beijing Forestry University, Beijing 100083, China.

\*Corresponding author: Huaili Zheng Email: hlz6512@163.com

First author: Yongzhi Liu Email: 1571709188@qq.com

This file contains three Texts, two Table and two Figures.

#### Text S1. Measurement of Intrinsic Viscosity

The intrinsic viscosity of TPADs was measured by the One Point Method [28,29]. The intrinsic viscosity of TPADs was determined using Ubbelohde capillary viscometer (Shanghai Shenyi Glass Instrument Co., Ltd., China) at 30±0.05 °C. The viscosity average molecular weight of the polymers was calculated according to their intrinsic viscosities. The calculation equation according to Formula (1) (GB/T 12005.10-1992), as follows:

$$M_r = 802[\eta]^{1.25} \quad \text{Formula (1)}$$

In this formula,  $M_r$  is the viscosity average molecular weight,  $[\eta]$  is the intrinsic viscosity (mL/g).

**Text S2.** Calculation method of supernatant turbidity (ST) and filter cake moisture content (FCMC)

Supernatant turbidity (ST) was measured with a HACH (HACH 2100Q, American Hach Company) turbidity meter at the depth 2 cm below the liquid surface. FCMC was calculated by the Formula (3).

$$\text{FCMC}\% = \frac{M_1 - M_2}{M_1 - M_0} \times 100\% \quad \text{Formula (3)}$$

Where  $M_1$  is the total weight of the filter cake and crucible before drying,  $M_2$  is the total weight of the filter cake and crucible after drying, and  $M_0$  is the weight of the crucible.

**Text S3.** Calculation method of specific resistance to filtration (SRF) and sludge flocs size

The quantitative paper with a 30-50  $\mu\text{m}$  pore size was cut to 7 cm in diameter and then was putted in Buchner funnel. The raw and conditioned sludge was poured into the Buchner funnel to filter under a pressure of 0.5-0.6 MPa of vacuum filtration. The volume change of filtrate was recorded every 10 s until vacuum breaking. The SRF of sludge was calculated by the Formula (4).

$$\text{SRF} = \frac{2bPA^2}{\mu W} \quad \text{Formula (4)}$$

Where SRF is the specific resistance to filtration of sludge (cm/g), P is the filtering pressure (Pa), A is the filtering area (cm<sup>2</sup>),  $\mu$  is the kinetic viscosity (Pa·s), b is the slope of the filtration equation curve in the Formula (5), and W is the filter cake weight per unit volume filter (g/mL), which can be calculated by the Formula (6).

$$\frac{t}{v} = bv + a \quad \text{Formula (5)}$$

Where t is the filtering time (s), and v is the filtrate volume (mL).

$$W = \frac{C_0 \cdot C_b}{C_0 - C_b} \quad \text{Formula (6)}$$

Where  $C_0$  is the moisture content of the initial sludge (g/mL) and  $C_b$  is the moisture content of the filter cake (g/mL).

Sludge flocs size were measured using a laser diffraction instrument (Mastersizer, 2000; Malvern, UK).

**Table S1.** Physical properties of the copolymers.

| Sample | Parameter |
|--------|-----------|
|--------|-----------|

|       | BET <sup>a</sup> specific<br>surface<br>area<br>(m <sup>2</sup> /g) | Langmuir<br>surface<br>area (m <sup>2</sup> /g) | Adsorption average pore<br>width (4V/A by BET)<br>(nm) |
|-------|---------------------------------------------------------------------|-------------------------------------------------|--------------------------------------------------------|
| PAD1  | 0.0289                                                              | 0.0327                                          | -                                                      |
| TPAD2 | 0.3394                                                              | 0.4743                                          | 14.14688                                               |
| TPAD4 | 0.4513                                                              | 0.6231                                          | 16.31059                                               |

a BET: Brunauer Emmett Teller.

**Table S2.** Details of used flocculant in flocculation and dewatering test.

| Flocculant <sup>a</sup> | TiO <sub>2</sub><br>(wt %) | Cationic<br>degree<br>(%) | [ $\eta$ ] (mL/g) | M <sub>r</sub><br>× 10 <sup>4</sup> |
|-------------------------|----------------------------|---------------------------|-------------------|-------------------------------------|
| TPAD1                   | 0.125                      | 30                        | 1487              | 740                                 |
| TPAD2                   | 0.250                      | 30                        | 1724              | 890                                 |
| TPAD3                   | 0.375                      | 30                        | 1690              | 869                                 |
| TPAD4                   | 0.500                      | 30                        | 1553              | 781                                 |
| PAD1                    | 0                          | 30                        | 1430              | 705                                 |
| CPAM                    | 0                          | 30                        | 1450              | 717                                 |

<sup>a</sup> TPAD (1-4): poly(AM-DAC) by photocatalytic surface-initiated polymerization using nano-TiO<sub>2</sub> as initiator; PAD1: poly(AM-DAC) by UV-initiation using VA-044 as initiator; CPAM: commercial poly(AM-DAC).

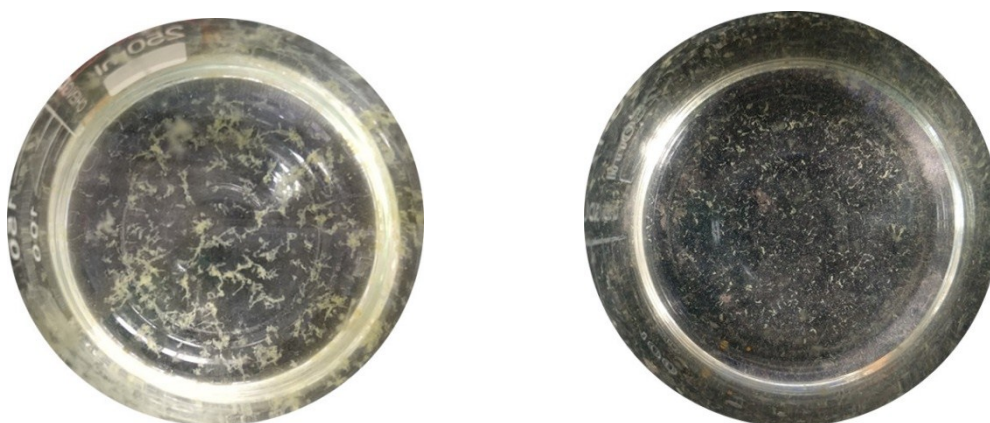

**Figure S1.** Floc photographs for (a) TPAD2 and (b) CPAM (Experimental conditions: 8 mg/L of dosage, pH=7.5).

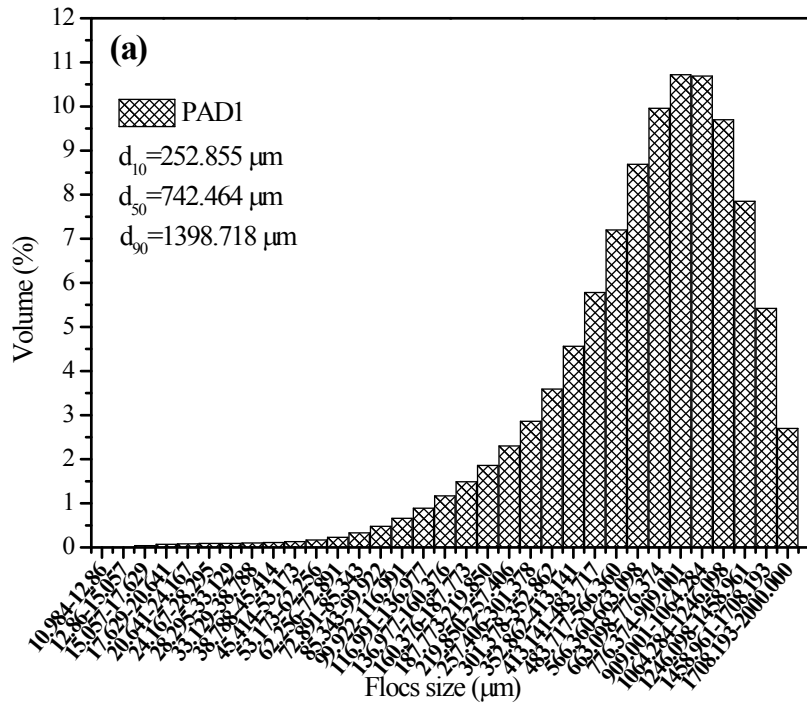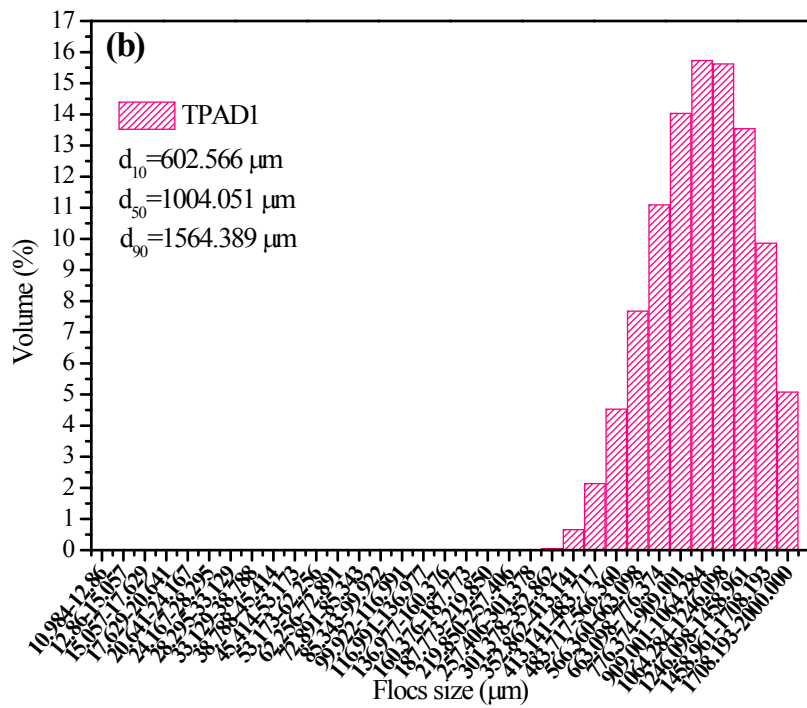

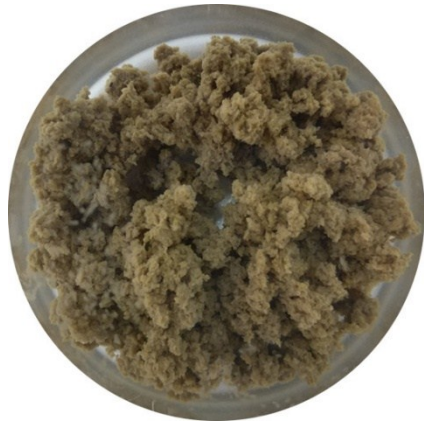

**(a)**

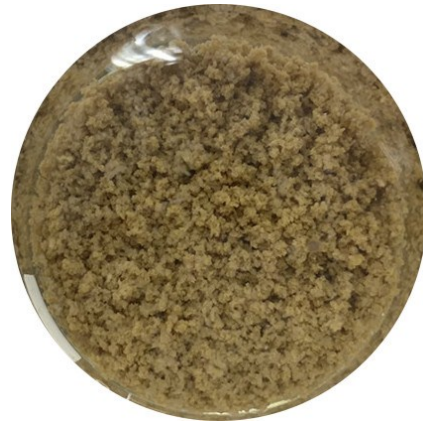

**(b)**

**Figure S2.** Sludge floc size distribution and Photographs for (a) TPAD1 and (b) PAD1 (Experimental conditions: 20 mg/L of dosage, pH=6.5).
